# Supplementary material
Source: Springer Nature journal article supplement (https://www.springermedizin.de/resource/supplementary/12904_2009_79_MOESM1_ESM.pdf/9518102)
Supplement: MOESM1 [file 9518102]

## *System Structure*

### **Environment Factors**

- Population Density
- Population Demographics
- Community Awareness/  
Perceived Importance of  
Health Issue
- Profession/Specialty Base

### **Network Characteristics**

- History/Evolution
- Network Structure
- Size of Membership
- Extent of Participation in  
Network among  
Members
- Policies and Procedures
- Power Equality
- Promotion of Network  
Ideals
- Vision/Culture

### **Economic Factors**

- Network Resources
- Extent of Volunteerism
- Financial Incentives
- Capacity for 24/7 Care

## *Process of Care*

### **Provider Characteristics**

- Beliefs/Attitudes
- Interpersonal Style
- Job Satisfaction
- Specialty Training and  
Experience

### **Extent of Collaboration Among Providers**

- Group Commitment
- Common Goals/Shared  
Values
- Perceived Interdependence
- Reciprocity
- Respect
- Shared Decision-Making  
and Problem Solving
- Shared Risk/Responsibility
- Trust

### **Information Transfer**

- Communication
- Information Systems and  
Materials
- Standardized Assessment  
and Monitoring of Patient  
Need

### **Organization Factors**

- Careteam Composition
- Educational Opportunities
- Incentives to Encourage  
Collaboration/Client-  
centred Care
- Leadership
- Role Recognition
- Standards of Practice
- Process Evaluation and  
Feedback

## *Patient Outcomes*

### **Satisfaction with Domains of Care and Access**

- Availability of Care
- Free Flow and Accessibility  
of Information
- Physical Care
- Pain and Symptom  
Management
- Psychosocial Care
- Management of Expected  
Death

### **Perceptions of Client- Centredness of Care**

- Appropriate Involvement of  
Family and Friends
- Collaboration/Team  
Management
- Education and Shared  
Knowledge
- Rapport
- Respect for Patient Needs  
and Preferences
- Sensitivity to Nonmedical  
and Spiritual Dimensions  
of Care

### **Perceptions of Continuity of Care**

- Relational
- Informational
- Managerial
